# Supplementary material for: Construction of a CoP/MnP/Cu3P heterojunction for efficient methanol oxidation-assisted seawater splitting
Source: Royal Society of Chemistry journal article supplement (doi:10.1039/d4qm01067a), 2025-01-01
Supplement: d4qm01067a1.pdf [file d4qm01067a1.pdf]

*Supplementary Material for*

**Construction of CoP/MnP/Cu<sub>3</sub>P heterojunction for efficient  
methanol oxidation-assisted seawater splitting**

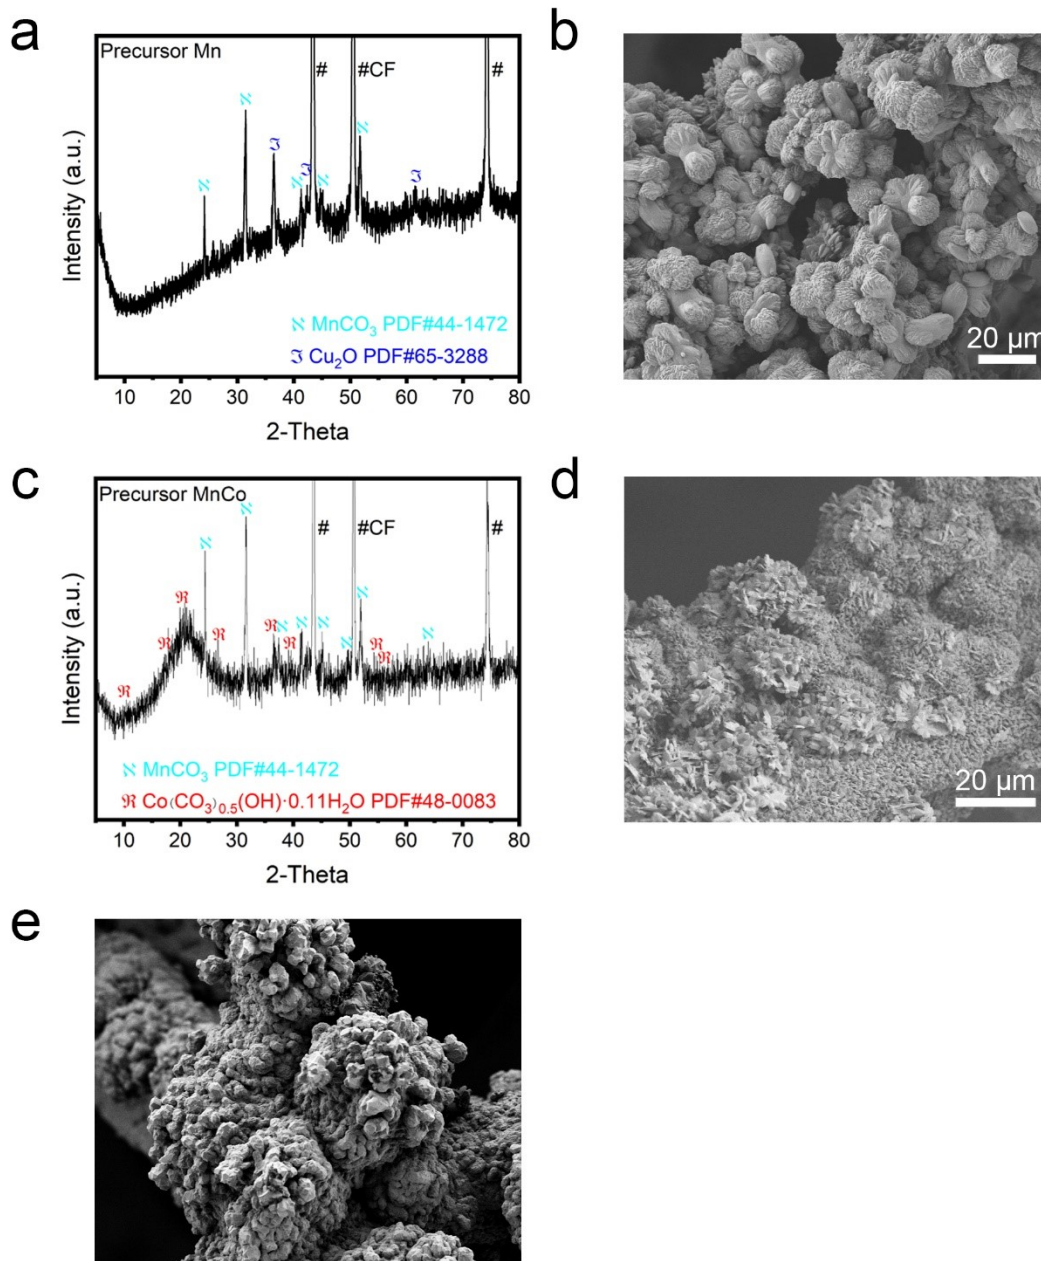

**Figure S1.** (a) XRD pattern of precursor Mn and its (b) SEM; (c) XRD pattern of precursor MnCo and its (d) SEM; (e) SEM of CoP/MnP/Cu<sub>3</sub>P@CF.

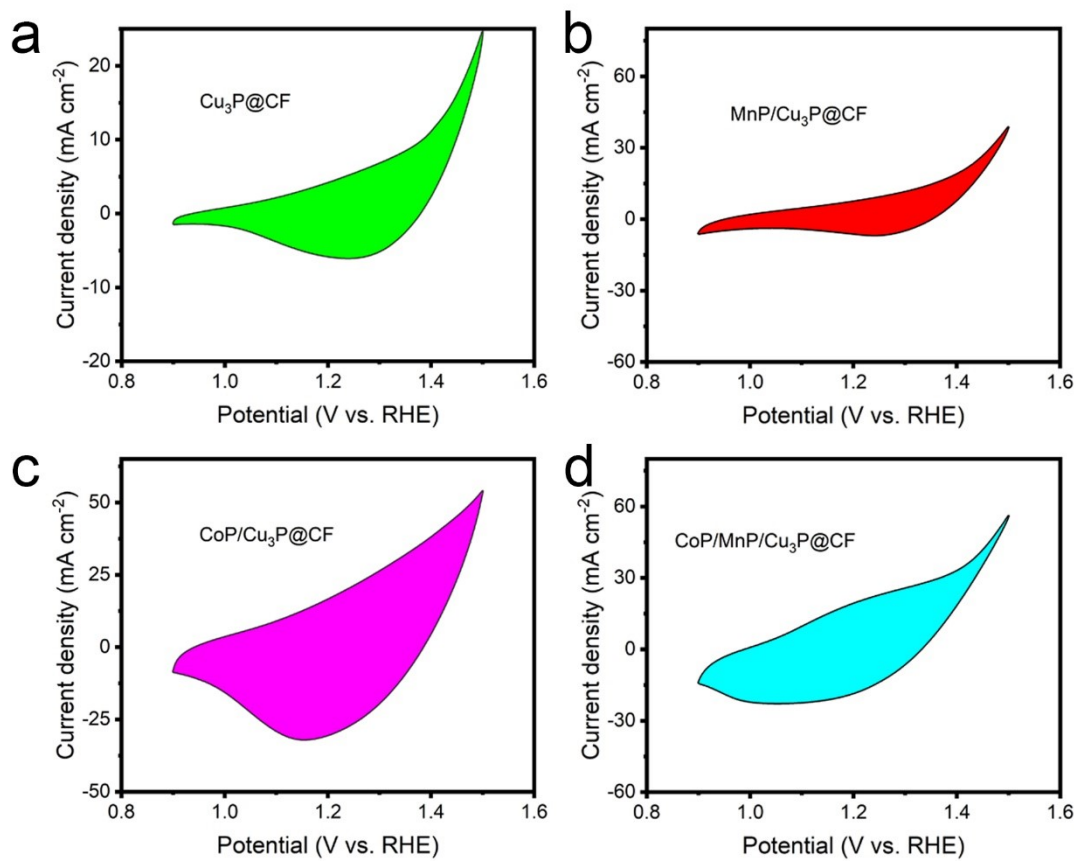

**Figure S2.** CV curves in the range of 0.9 ~ 1.5 V vs. RHE at a scan rate of 50 mV s<sup>-1</sup> used to calculate the TOF of the OER.

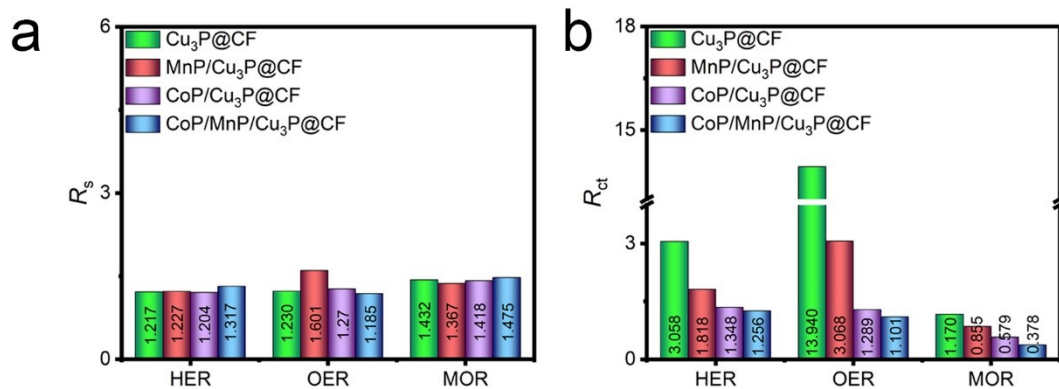

**Figure S3.** Comparison of  $R_s$  and  $R_{ct}$  values of equivalent circuits at HER, OER, and MOR for different samples in different electrolytes, respectively.

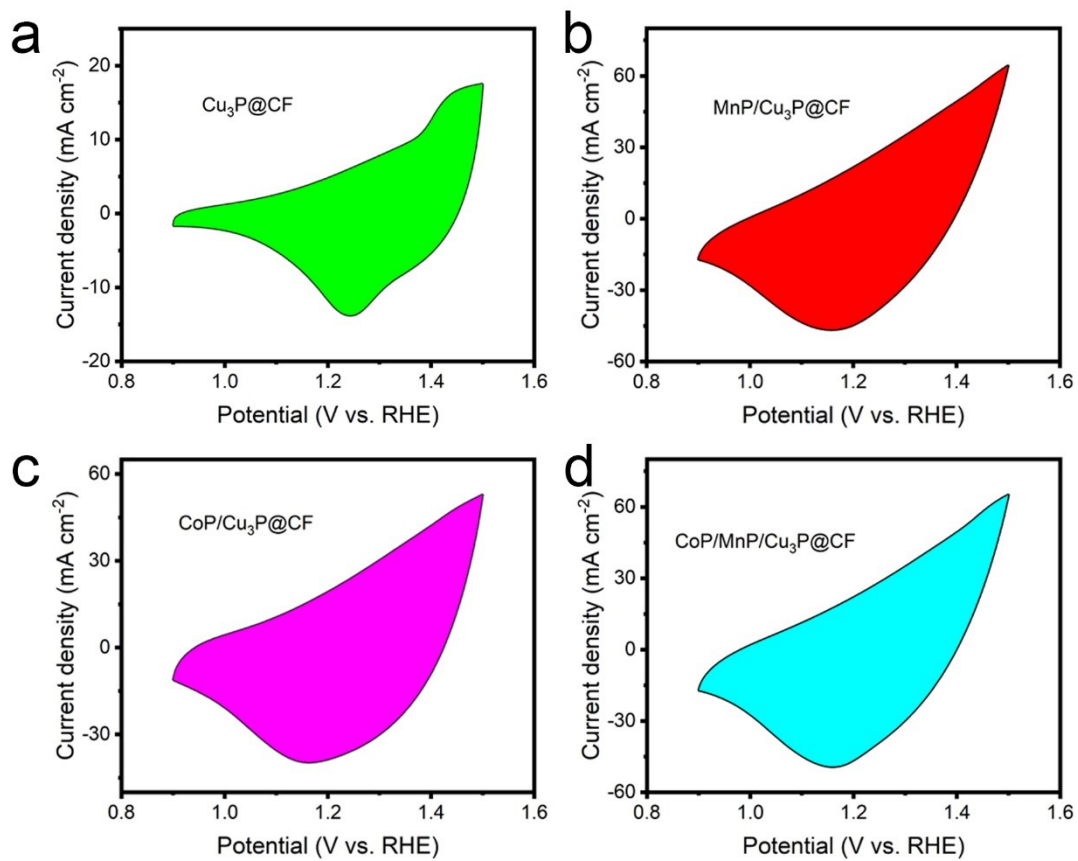

**Figure S4.** CV curves in the range of 0.9 ~ 1.5 V vs. RHE at a scan rate of 50 mV s<sup>-1</sup> used to calculate the TOF of the MOR.

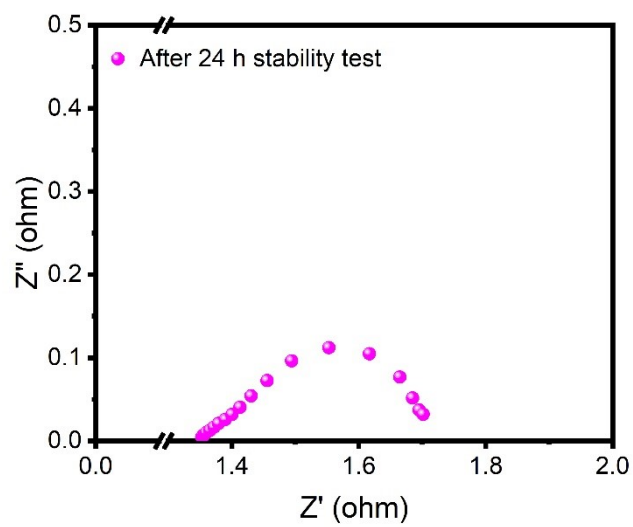

**Figure S5.** Nyquist plot of CoP/MnP/Cu<sub>3</sub>P@CF in seawater + 1M KOH + 1M methanol electrolyte after 24 h of stability test.

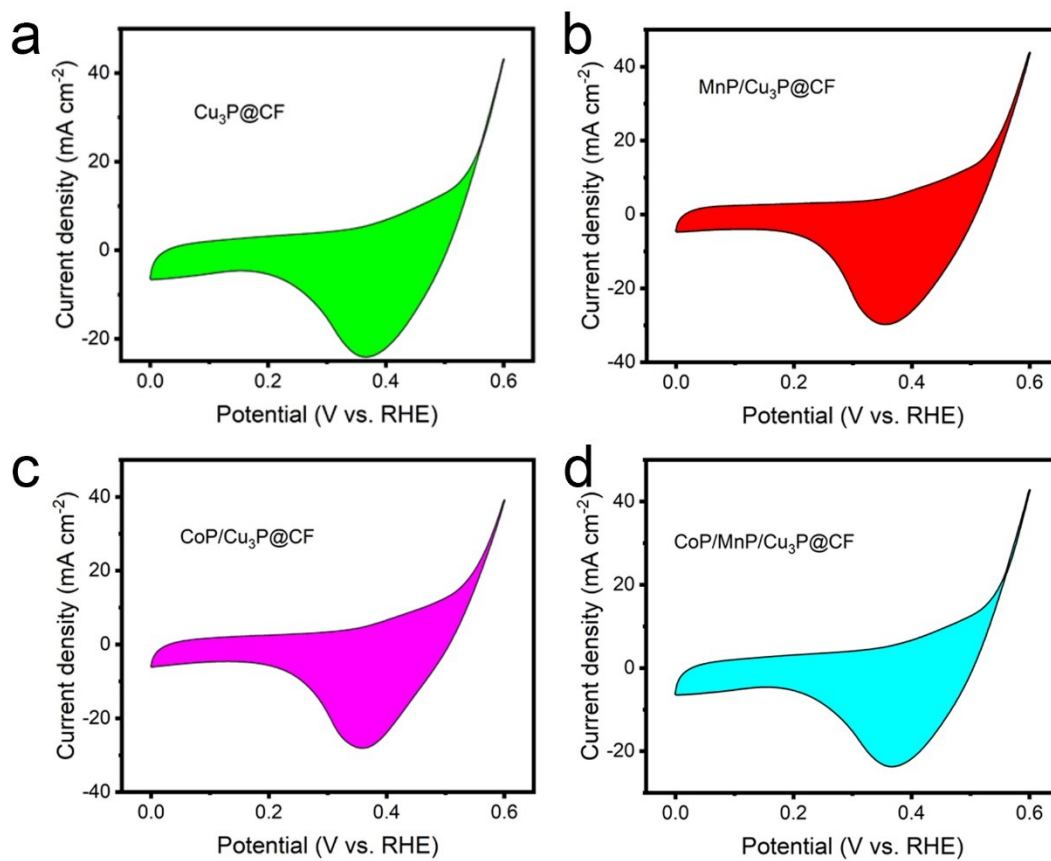

**Figure S6.** CV curves in the range 0 ~ 0.6 V vs. RHE at a scan rate of 50 mV s<sup>-1</sup> used to calculate the TOF of the HER.

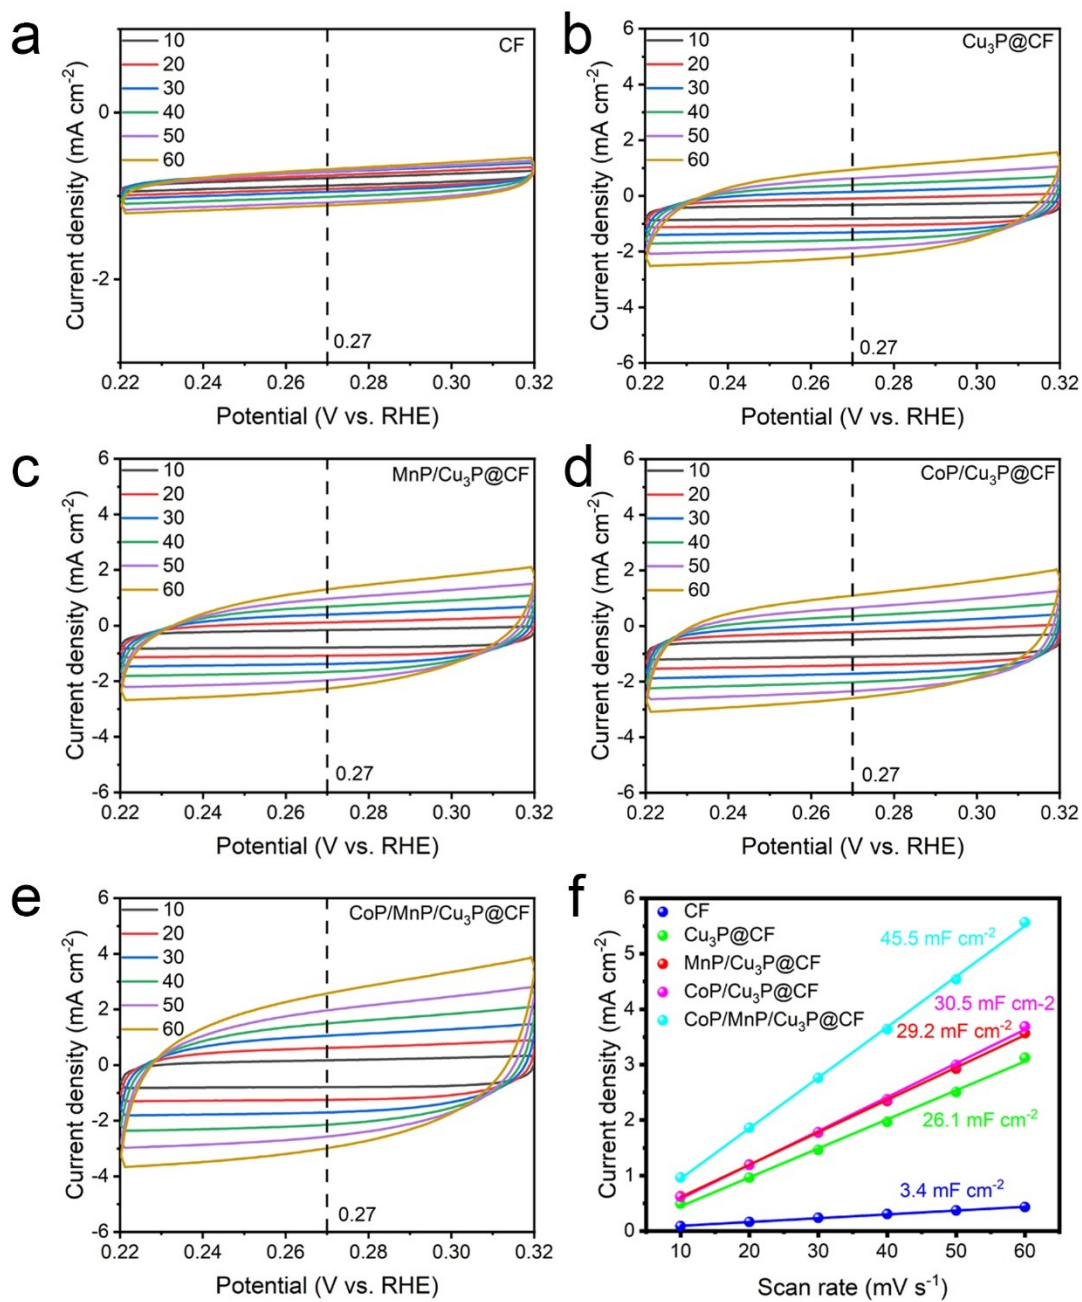

**Figure S7.** CV curves and corresponding  $C_{dl}$  values for (a) CF, (b)  $\text{Cu}_3\text{P}@CF$ , (c)  $\text{MnP}/\text{Cu}_3\text{P}@CF$ , (d)  $\text{CoP}/\text{Cu}_3\text{P}@CF$ , and (e)  $\text{CoP}/\text{MnP}/\text{Cu}_3\text{P}@CF$  in the non-Faraday region (0.22 ~ 0.32 V vs. RHE).



**Table S1.** Comparison of OER performances of MnP/CoP/Cu<sub>3</sub>P@CF with other reported electrocatalysts.

| Material                                             | Electrolyte           | Tafel slope<br>(mV dec <sup>-1</sup> ) | Current density @<br>Potential                  | Reference |
|------------------------------------------------------|-----------------------|----------------------------------------|-------------------------------------------------|-----------|
| CoP/MnP/Cu <sub>3</sub> P@CF                         | 1 M KOH +<br>Seawater | 43                                     | 10 mA cm <sup>-2</sup> at 1.530<br>V (vs. RHE)  | This work |
| NiMoPx@Ni <sub>5</sub> P <sub>4</sub>                | 1 M KOH               | –                                      | 10 mA cm <sup>-2</sup> at ~1.56<br>V (vs. RHE)  | [1]       |
| Ni <sub>3</sub> S <sub>2</sub> -CNFs@CC              | 1 M KOH               | –                                      | 10 mA cm <sup>-2</sup> at ~1.540<br>V (vs. RHE) | [2]       |
| Co <sub>10%</sub> -CuV                               | 1 M KOH               | 141                                    | 10 mA cm <sup>-2</sup> at ~1.610<br>V (vs. RHE) | [3]       |
| Co <sub>2</sub> V <sub>2</sub> O <sub>7</sub> NRs@NF | 1 M KOH               | 76                                     | 10 mA cm <sup>-2</sup> at ~1.570<br>V (vs. RHE) | [4]       |
| NiVP/Pi-VC                                           | 1 M KOH               | 120                                    | 10 mA cm <sup>-2</sup> at ~1.530<br>V (vs. RHE) | [5]       |
| r-Se/NiSe <sub>2</sub> @NF                           | 1 M KOH +<br>Seawater | 90                                     | 10 mA cm <sup>-2</sup> at ~1.550<br>V (vs. RHE) | [6]       |

**Table S2.** Comparison of MOR performances of MnP/CoP/Cu<sub>3</sub>P@CF with other reported electrocatalysts.

| Material                                           | Electrolyte                             | Tafel slope<br>(mV dec <sup>-1</sup> ) | Current density @<br>Potential                   | Reference |
|----------------------------------------------------|-----------------------------------------|----------------------------------------|--------------------------------------------------|-----------|
| CoP/MnP/Cu <sub>3</sub> P@CF                       | 1 M KOH + 1 M<br>Methanol +<br>Seawater | 76.2                                   | 10 mA cm <sup>-2</sup> at 1.356<br>V (vs. RHE)   | This work |
| NiFe <sub>2</sub> O <sub>4</sub> @NF               | 1 M KOH + 0.5<br>+ Methanol             | 28.5                                   | 10 mA cm <sup>-2</sup> at ~<br>1.410 V (vs. RHE) | [7]       |
| NiMoP <sub>x</sub> @Ni <sub>3</sub> P <sub>4</sub> | 1 M KOH + 1 M<br>Methanol               | 14.8                                   | 10 mA cm <sup>-2</sup> at 1.360<br>mV (vs. RHE)  | [1]       |
| NiFe LDH@NiMo                                      | 1 M KOH + 0.5<br>+ Methanol             | 54.0                                   | 10 mA cm <sup>-2</sup> at 1.360<br>mV (vs. RHE)  | [8]       |
| Ni <sub>3</sub> S <sub>2</sub> -CNFs@CC            | 1 M KOH + 1 M<br>Methanol               | –                                      | 10 mA cm <sup>-2</sup> at ~<br>1.350 V (vs. RHE) | [2]       |
| NiFe-LDH/NiFe-<br>HAB@CF                           | 1 M KOH + 3 M<br>Methanol               | –                                      | 10 mA cm <sup>-2</sup> at ~<br>1.400 V (vs. RHE) | [9]       |
| r-Se/NiSe <sub>2</sub> @NF                         | 1 M KOH +<br>0.33 M Urea +<br>Seawater  | 82                                     | 10 mA cm <sup>-2</sup> at ~<br>1.420 V (vs. RHE) | [6]       |

**Table S3.** Comparison of HER performances of MnP/CoP/Cu<sub>3</sub>P@CF with other reported electrocatalysts.

| Material                                             | Electrolyte           | Tafel slope<br>(mV dec <sup>-1</sup> ) | Current density @<br>Potential                 | Reference |
|------------------------------------------------------|-----------------------|----------------------------------------|------------------------------------------------|-----------|
| MnP/CoP/Cu <sub>3</sub> P@CF                         | 1 M KOH +<br>Seawater | 85                                     | 10 mA cm <sup>-2</sup> at 146<br>mV (vs. RHE)  | This work |
| Cu-Co <sub>0.85</sub> Se@NC                          | 1 M KOH               | 162                                    | 10 mA cm <sup>-2</sup> at 208<br>mV (vs. RHE)  | [10]      |
| Co <sub>10%</sub> -CuV                               | 1 M KOH               | 94                                     | 10 mA cm <sup>-2</sup> at 176<br>mV (vs. RHE)  | [3]       |
| Co <sub>2</sub> V <sub>2</sub> O <sub>7</sub> NRs@NF | 1 M KOH               | 114                                    | 10 mA cm <sup>-2</sup> at ~160<br>mV (vs. RHE) | [4]       |
| NiVP/Pi-VC                                           | 1 M KOH               | 104                                    | 10 mA cm <sup>-2</sup> at ~150<br>mV (vs. RHE) | [5]       |
| r-Se/NiSe <sub>2</sub> @NF                           | 1 M KOH +<br>Seawater | 146                                    | 10 mA cm <sup>-2</sup> at ~180<br>mV (vs. RHE) | [6]       |

**Table S4.** Comparison of OMS performances of CoP/MnP/Cu<sub>3</sub>P@CF with other reported electrocatalysts.

| Two-electrode electrolyzer                                                                                      | Electrolyte                            | Cell voltage                           | Reference |
|-----------------------------------------------------------------------------------------------------------------|----------------------------------------|----------------------------------------|-----------|
| CoP/MnP/Cu <sub>3</sub> P@CF   <br>CoP/MnP/Cu <sub>3</sub> P@CF                                                 | 1 M KOH + 1 M<br>Methanol + Seawater   | 1.410 V for 10<br>mA cm <sup>-2</sup>  | This work |
| NiFe <sub>2</sub> O <sub>4</sub> @NF    NiFe <sub>2</sub> O <sub>4</sub> @NF                                    | 1 M KOH + 0.5 M<br>Methanol + Seawater | 1.520 V for 10<br>mA cm <sup>-2</sup>  | [7]       |
| NiMoPx@Ni <sub>5</sub> P <sub>4</sub>    NiMoPx@Ni <sub>5</sub> P <sub>4</sub>                                  | 1 M KOH + 1 M<br>Methanol              | ~1.42 V for 10<br>mA cm <sup>-2</sup>  | [1]       |
| Cu-Co <sub>0.85</sub> Se@NC    Cu-<br>Co <sub>0.85</sub> Se@NC                                                  | 1 M KOH + 0.12 M<br>Methanol           | 1.460 V for 10<br>mA cm <sup>-2</sup>  | [10]      |
| NiFe LDH@NiMo    NiFe<br>LDH@NiMo                                                                               | 1 M KOH + 0.5 M<br>Methanol            | ~1.410 V for 10<br>mA cm <sup>-2</sup> | [8]       |
| Co <sub>2</sub> V <sub>2</sub> O <sub>7</sub> NRs@NF    Co <sub>2</sub> V <sub>2</sub> O <sub>7</sub><br>NRs@NF | 1 M KOH + 50 mM<br>Glucose             | 1.510 V for 10<br>mA cm <sup>-2</sup>  | [4]       |
| r-Se/NiSe <sub>2</sub> @NF    r-Se/NiSe <sub>2</sub> @NF                                                        | 1 M KOH + 0.33 M<br>Urea+ Seawater     | 1.590 V for 10<br>mA cm <sup>-2</sup>  | [6]       |

## References

1. Zhu, B.; Xiong, J.; Wu, S.; You, K.; Sun, B.; Liu, Y.; Chen, M.; Jin, P.; Feng, L., *Advanced Functional Materials* **2024**, 2407236.
2. Zhao, B.; Liu, J.; Wang, X.; Xu, C.; Sui, P.; Feng, R.; Wang, L.; Zhang, J.; Luo, J.-L.; Fu, X.-Z., *Nano Energy* **2021**, 80, 105530.
3. Tripathi, V.; Jain, S.; Kabra, D.; Panchakarla, L. S.; Dutta, A., *Nanoscale Advances* **2023**, 5 (1), 237-246.
4. Ashoka, S.; Sushmitha, M.; Shirisha, M.; Akshaya, H. M.; Yogesh, K.; Girish Kumar, S., *Materials Science in Semiconductor Processing* **2024**, 184, 108838.
5. Thakur, N.; Mehta, D.; Chaturvedi, A.; Mandal, D.; Nagaiah, T. C., *Journal of Materials Chemistry A* **2023**, 11 (29), 15868-15877.
6. Khatun, S.; Roy, P., *Journal of Colloid and Interface Science* **2023**, 630, 844-854.
7. Du, X.; Tan, M.; Wei, T.; Kobayashi, H.; Song, J.; Peng, Z.; Zhu, H.; Jin, Z.; Li, R.; Liu, W., *Chemical Engineering Journal* **2023**, 452, 139404.
8. Wang, J. Y.; Sun, L. P.; Li, Q.; Huo, L. H.; Zhao, H., *Materials Today Chemistry* **2023**, 27, 101338.
9. Jiang, S.; Xiao, T.; Xu, C.; Wang, S.; Peng, H.-Q.; Zhang, W.; Liu, B.; Song, Y.-F., *Small* **2023**, 19 (27), 2208027.
10. Hu, L.; Zhong, P.; Zhu, J.; Wang, J.; Zheng, Y.; Lin, X.; Zhang, Y.; Yang, H., *CrystEngComm* **2024**, 26 (35), 4804-4811.
